# Supplementary material for: Calcification response of planktic foraminifera to environmental change in the western Mediterranean Sea during the industrial era
Source: Copernicus journal article supplement (doi:10.5194/bg-20-1505-2023), 2023-04-14
Supplement: Supplementary file 2 [file bg-20-1505-2023-supplement.zip]

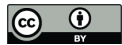

## *Supplement of*

# **Calcification response of planktic foraminifera to environmental change in the western Mediterranean Sea during the industrial era**

**Thibault M. Béjard et al.**

*Correspondence to:* Thibault M. Béjard (thibault.bejard@usal.es)

- bg-20-1505-2023-supplement-title-page.pdf
- Bejard\_SuppData\_v2
  - .DS\_Store
  - Area correlations\_linear modelling.R
  - Bejard\_2022\_Forams\_Calcification\_SuppData.xlsx
  - GAM\_results.csv
  - SBW\_MBW.xlsx
  - SEM\_pictures
    - \* GBulloides\_HighCalcified.tif
    - \* GBulloides\_HighCalcified\_Zoom.tif
    - \* GBulloides\_LowCalcify.tif
    - \* GBulloides\_LowCalcify\_Zoom.tif
    - \* GTruncatulinoidea\_HighCalcify\_Zoom.tif
    - \* GTruncatulinoidea\_LowCalcify.tif
    - \* GTruncatulinoidea\_LowCalcify\_Zoom.tif
    - \* Gtruncatulinoidea\_HighCalcify.tif
    - \* NIncompta\_HighCalcify\_zoom.tif
    - \* NIncompta\_High\_Calcify.tif
    - \* NIncompta\_LowCalcify.tif
    - \* NIncompta\_LowCalcify\_Zoom.tif
  - data\_analyses.R
  - environmental.xlsx
- SUPPLEMENT.pdf

The copyright of individual parts of the supplement might differ from the article licence.
